# Supplementary material for: Predictive Roles of Basal Metabolic Rate and Body Water Distribution in Sarcopenia and Sarcopenic Obesity: The link to Carbohydrates
Source: MDPI journal article supplement (doi:10.3390/nu14193911), 2022-09-21
Supplement: s1 [file s1]

## **Supplementary File**

Supplementary Table S1. Demographic and clinical characteristics

Supplementary Table S2. The consumption of macronutrients and micronutrients between different population

Supplementary Table S3. Association between BMR, body composition, dietary components and SMI

Supplementary Table S4. Determinate important factors for predicting sarcopenia and sarcopenic obesity

Supplementary Table S5. Predictive role of BMR and ECW/ICW

Supplementary Table S6. Predictive role of BMR and ECW/TBW

Supplementary Table S7. Correlations among SMI, BMR, carbohydrates intake and body water distribution

Supplementary Table S8. Moderated mediation analysis for carbohydrates, BMR, SMI and body water distribution

**Supplementary Table S1. Demographic and clinical characteristics**

| Characteristics    | Total                 | Healthy                         | Sarcopenia                      | Sarcopenic obesity              | Obesity                         | <i>P</i>  |
|--------------------|-----------------------|---------------------------------|---------------------------------|---------------------------------|---------------------------------|-----------|
| TOTAL              | 402                   | 118                             | 20                              | 12                              | 252                             |           |
| Sex, n(%)          |                       |                                 |                                 |                                 |                                 |           |
| Men                | 240                   | 78(66.1)                        | 12 (60.0)                       | 6(50.0)                         | 144(57.1)                       | 0.367     |
| Women              | 162                   | 40(33.9)                        | 8 (40.0)                        | 6(50.0)                         | 108(42.9)                       |           |
| Age groups, n(%)   |                       |                                 |                                 |                                 |                                 |           |
| 50-64years         | 101                   | 34(28.8)                        | 1(5.0)                          | 0(0.0)                          | 66(26.2)                        | <0.001*** |
| 65-79years         | 264                   | 75(63.6)                        | 11(55.0)                        | 9(75.0)                         | 169(67.1)                       |           |
| 80 years and older | 37                    | 9(7.6) <sup>a</sup>             | 8(40.0) <sup>a, b</sup>         | 3(25.0)                         | 17(6.7) <sup>b</sup>            |           |
| BMI, n(%)          |                       |                                 |                                 |                                 |                                 |           |
| < 18.5             | 20                    | 13(11.0) <sup>a</sup>           | 7(35.0) <sup>a</sup>            | 0(0.0)                          | 0(0.0)                          | <0.001*** |
| 18.5-23.9          | 173                   | 90(76.3) <sup>a</sup>           | 13(65.0) <sup>b</sup>           | 8(66.7) <sup>c</sup>            | 62(24.6) <sup>a, b, c</sup>     |           |
| 24-27.9            | 168                   | 15(12.7) <sup>a</sup>           | 0(0.0)                          | 3(25.0)                         | 150(59.5) <sup>a</sup>          |           |
| ≥28                | 41                    | 0(0.0)                          | 0(0.0)                          | 1(8.3)                          | 40(15.9)                        |           |
| Blood biomarkers   |                       |                                 |                                 |                                 |                                 |           |
| Blood glucose      | 5050(5.00,6.20)       | 5.21(1.80,5.83) <sup>a, b</sup> | 5.21(4.80,5.83) <sup>c, d</sup> | 5.79(5.52,6.33) <sup>a, c</sup> | 5.60(5.10,6.40) <sup>b, d</sup> | 0.001**   |
| Hb                 | 139.00(129.00,151.00) | 141.59±16.15                    | 129.15±8.90                     | 141.17±23.21                    | 140.00(129.00,151.00)           | 0.06      |
| TG                 | 1.39(1.09,1.98)       | 1.18(0.96,1.50) <sup>a</sup>    | 1.13±0.37 <sup>b</sup>          | 1.67(1.01,1.87)                 | 1.57(1.16,2.28) <sup>a, b</sup> | <0.001*** |
| TC                 | 5.46(4.73,6.26)       | 5.37±1.29                       | 5.38±1.16                       | 5.49±1.74                       | 5.49±1.34                       | 0.854     |

---

Continuous variables are shown as mean  $\pm$  standard deviation for variables with normal distribution, median (interquartile range [IQR]) for nonnormal distributions.

Categorical variables are shown as n (%).

BMI, Body mass index; Hb, Hemoglobin; TG, Triglyceride; TC, Serum total cholesterol.

<sup>a, b, c</sup> declared  $P < 0.05$  between two means with the same upper letter in the same line.

<sup>\*\*</sup>  $P < 0.01$ , <sup>\*\*\*</sup>  $P < 0.001$

**Supplementary Table S2. The consumption of macronutrients and micronutrients between different population**

|                            | Healthy   |          |                        | Sarcopenia |         |           | Sarcopenic obesity |         |                     | Obesity   |          |                      | <i>P</i> |
|----------------------------|-----------|----------|------------------------|------------|---------|-----------|--------------------|---------|---------------------|-----------|----------|----------------------|----------|
|                            | < EAR     | > EAR    | > RNI                  | < EAR      | > EAR   | > RNI     | < EAR              | > EAR   | > RNI               | < EAR     | > EAR    | > RNI                |          |
| <b>Macronutrients</b>      |           |          |                        |            |         |           |                    |         |                     |           |          |                      |          |
| Carbohydrates (g/d)        | 3(2.5)    | 23(19.5) | 92(78.0)               | 1(5.0)     | 4(20.0) | 15(75)    | 0(0.0)             | 2(16.7) | 10(83.3)            | 2(0.8)    | 39(15.5) | 211(83.7)            | 0.386    |
| Total proteins (g/d)       | 67(56.8)  | 13(11.0) | 38(32.2)               | 9(45.0)    | 1(5.0)  | 10(50.0)  | 8(66.7)            | 2(16.7) | 2(16.7)             | 144(57.1) | 22(8.7)  | 86(34.1)             | 0.557    |
| <b>Micronutrients</b>      |           |          |                        |            |         |           |                    |         |                     |           |          |                      |          |
| Magnesium (mg/d)           | 39(33.1)  | 31(26.3) | 48(40.7)               | 4(20.0)    | 5(25.0) | 11(55.0)  | 4(33.3)            | 3(25.0) | 5(41.7)             | 67(26.6)  | 74(29.4) | 111(44.0)            | 0.812    |
| Phosphorus (mg/d)          | 5(4.2)    | 15(12.7) | 98(83.1)               | 1(5.0)     | 1(5.0)  | 18(90.0)  | 0(0.0)             | 2(16.7) | 10(83.3)            | 2(0.8)    | 28(11.1) | 222(88.1)            | 0.192    |
| Ferrum (mg/d)              | 0(0.0)    | 0(0.0)   | 118(100.0)             | 0(0.0)     | 0(0.0)  | 20(100.0) | 0(0.0)             | 0(0.0)  | 12(100.0)           | 0(0.0)    | 0(0.0)   | 252(100.0)           | —        |
| Calcium (mg/d)             | 100(84.7) | 7(5.9)   | 11(9.3)                | 17(85.0)   | 1(5.0)  | 2(10.0)   | 9(75.0)            | 2(16.7) | 1(8.3)              | 195(77.7) | 22(8.8)  | 34(13.5)             | 0.640    |
| Vitamin A (μg/d)           | 53(44.9)  | 12(10.2) | 53(44.9)               | 8(40.0)    | 1(5.0)  | 11(55.0)  | 7(58.3)            | 0(0.0)  | 5(41.7)             | 128(50.8) | 25(9.9)  | 99(39.3)             | 0.646    |
| Vitamin B1 (μg/d)          | 113(95.8) | 4(3.4)   | 1(0.8)                 | 20(100.0)  | 0(0.0)  | 0(0.0)    | 11(91.7)           | 0(0.0)  | 1(8.3)              | 229(90.9) | 15(6.0)  | 8(3.2)               | 0.399    |
| Vitamin B2(μg/d)           | 0(0.0)    | 0(0.0)   | 118(100.0)             | 0(0.0)     | 0(0.0)  | 20(100.0) | 0(0.0)             | 0(0.0)  | 12(100.0)           | 0(0.0)    | 0(0.0)   | 252(100.0)           | —        |
| Vitamin B3(μg/d)           | 39(33.1)  | 38(32.2) | 41(34.7)               | 5(25.0)    | 7(35.0) | 8(40.0)   | 5(41.7)            | 3(25.0) | 4(33.3)             | 82(32.5)  | 62(24.6) | 108(42.9)            | 0.647    |
| Vitamin C (mg/d)           | 34(29.1)  | 5(4.3)   | 78(66.7)               | 3(15.0)    | 2(10.0) | 15(75.0)  | 3(25.0)            | 1(8.3)  | 8(66.7)             | 66(26.2)  | 12(4.8)  | 174(69.0)            | 0.667    |
|                            | < EER     |          | > EER                  | < EER      |         | > EER     | < EER              |         | > EER               | < EER     |          | > EER                | <i>P</i> |
| Total energy (kcal/d)      | 109(92.4) |          | 9(7.6)                 | 18(90.0)   |         | 2(10.0)   | 11(91.7)           |         | 1(8.3)              | 211(83.7) |          | 41(16.3)             | 0.114    |
|                            | ≤ AMDR    |          | > AMDR                 | ≤ AMDR     |         | > AMDR    | ≤ AMDR             |         | > AMDR              | ≤ AMDR    |          | > AMDR               | <i>P</i> |
| Carbohydrate density (%/E) | 117(99.2) |          | 1(0.8) <sup>a, b</sup> | 20(100.0)  |         | 0(0.0)    | 11(91.7)           |         | 1(8.3) <sup>a</sup> | 236(93.7) |          | 16(6.3) <sup>b</sup> | 0.046*   |
| Lipids density (%/E)       | 0(0.0)    |          | 118(100.0)             | 0(0.0)     |         | 20(100.0) | 0(0.0)             |         | 12(100.0)           | 5(2.0)    |          | 247(98.0)            | 0.461    |
|                            | < AI      |          | > AI                   | < AI       |         | > AI      | < AI               |         | > AI                | < AI      |          | > AI                 | <i>P</i> |

|                  |          |            |         |           |         |           |           |           |       |
|------------------|----------|------------|---------|-----------|---------|-----------|-----------|-----------|-------|
| Manganese (mg/d) | 0(0.0)   | 118(100.0) | 0(0.0)  | 20(100.0) | 0(0.0)  | 12(100.0) | 3(1.2)    | 228(98.8) | 0.653 |
| Potassium (mg/d) | 84(71.2) | 34(28.8)   | 9(45.0) | 11(55.0)  | 9(75.0) | 3(25.0)   | 157(62.3) | 95(37.7)  | 0.079 |

Categorical variables are shown as n (%).

<sup>a, b</sup> declared  $P < 0.05$  between two means with the same upper letter in the same line.

\*  $P < 0.05$

**Supplementary Table S3. Association between BMR, body composition, dietary components and SMI**

| Factor included                | MODEL 3        |              |           | MODEL 4        |              |           |
|--------------------------------|----------------|--------------|-----------|----------------|--------------|-----------|
|                                | Unstandardized | Standardized | <i>P</i>  | Unstandardized | Standardized | <i>P</i>  |
|                                | B(95% CI)      | $\beta$      |           | B(95% CI)      | $\beta$      |           |
| Sex                            | -0.283         | -0.139       | <0.001*** | -0.283         | -0.139       | <0.001*** |
| Age                            | -0.004         | -0.025       | 0.183     | -0.004         | -0.025       | 0.182     |
| BMR                            | 0.006          | 1.041        | <0.001*** | 0.006          | 1.041        | <0.001*** |
| ECW/ICW                        | -3.597         | -0.070       | <0.001*** |                |              |           |
| ECW/TBW                        |                |              |           | -9.579         | -0.069       | <0.001*** |
| Percentage<br>Body Fat (%)     | 0.038          | 0.287        | <0.001*** | 0.038          | 0.287        | <0.001*** |
| WHR                            | -4.256         | -0.255       | <0.001*** | -4.252         | -0.255       | <0.001*** |
| Blood glucose                  | 0.001          | 0.002        | 0.897     | 0.001          | 0.002        | 0.898     |
| Hb                             | -0.002         | -0.030       | 0.089     | -0.002         | -0.030       | 0.091     |
| TG                             | 0.015          | 0.018        | 0.280     | 0.015          | 0.018        | 0.281     |
| Total energy<br>(kcal/d)       | <0.001         | -0.125       | 0.025*    | <0.001         | -0.125       | 0.025*    |
| Carbohydrates<br>density (%/E) | -0.034         | -0.271       | 0.042*    | -0.034         | -0.271       | 0.042*    |
| Protein density<br>(%E)        | -0.030         | -0.087       | 0.066     | -0.030         | -0.087       | 0.066     |
| Lipids density<br>(%/E)        | -0.034         | -0.242       | 0.039*    | -0.034         | -0.241       | 0.039*    |
| Dietary fiber<br>(g/d)         | 0.004          | 0.024        | 0.398     | 0.004          | 0.024        | 0.400     |

WHR, Waist hip ratio; TBW, Total body water; ICW, Intracellular water; ECW, Extracellular water; BMR, Basal metabolic rate; SMI, Appendicular skeletal muscle index; Hb, Hemoglobin; TG, Triglyceride; TC, Serum total cholesterol.

\*  $P < 0.05$ , \*\*\*  $P < 0.001$

**Supplementary Table S4. Determinate important factors for predicting sarcopenia and sarcopenic obesity**

|                                   | Sensitivity | Specificity | Cut-off value |
|-----------------------------------|-------------|-------------|---------------|
| <b>BMR</b>                        |             |             |               |
| Healthy vs. Sarcopenia            | 0.900       | 0.568       | 1316.2570     |
| Healthy vs. Sarcopenic obesity    | 0.917       | 0.661       | 1271.2500     |
| Sarcopenia vs. Sarcopenic obesity | 0.833       | 0.450       | 1256.6730     |
| <b>BMR/BMI</b>                    |             |             |               |
| Healthy vs. Sarcopenia            | 0.250       | 0.881       | 70.4416       |
| Healthy vs. Sarcopenic obesity    | 0.917       | 0.746       | 56.8966       |
| Sarcopenia vs. Sarcopenic obesity | 0.917       | 0.750       | 57.2843       |
| <b>BMR/BSA</b>                    |             |             |               |
| Healthy vs. Sarcopenia            | 0.900       | 0.525       | 832.2929      |
| Healthy vs. Sarcopenic obesity    | 0.917       | 0.720       | 810.7782      |
| Sarcopenia vs. Sarcopenic obesity | 0.750       | 0.800       | 791.1238      |
| <b>BMR/Height<sup>2</sup></b>     |             |             |               |
| Healthy vs. Sarcopenia            | 0.750       | 0.720       | 0.0479        |
| Healthy vs. Sarcopenic obesity    | 0.500       | 0.695       | 0.0481        |
| Sarcopenia vs. Sarcopenic obesity | 0.833       | 0.600       | 0.0474        |
| <b>ECW/ICW</b>                    |             |             |               |
| Healthy vs. Sarcopenia            | 0.667       | 0.644       | 0.6348        |
| Healthy vs. Sarcopenic obesity    | 0.850       | 0.720       | 0.6370        |
| Sarcopenia vs. Sarcopenic obesity | 0.583       | 0.850       | 0.6373        |
| <b>ECW/TBW</b>                    |             |             |               |
| Healthy vs. Sarcopenia            | 0.850       | 0.720       | 0.3891        |
| Healthy vs. Sarcopenic obesity    | 0.667       | 0.644       | 0.3883        |
| Sarcopenia vs. Sarcopenic obesity | 0.583       | 0.850       | 0.3892        |

BMI, Body mass index; BMR, Basal metabolic rate; BSA, Body surface area; TBW, Total body water; ICW, Intracellular water; ECW, Extracellular water.

**Supplementary Table S5. Predictive role of BMR and ECW/ICW**

|                                          | MODEL 3 BMR             |           | MODEL 3 BMR/BMI         |           | MODEL 3 BMR/BSA         |          | MODEL 3 BMR/ Height <sup>2</sup> |          |
|------------------------------------------|-------------------------|-----------|-------------------------|-----------|-------------------------|----------|----------------------------------|----------|
|                                          | OR(95% CI)              | <i>P</i>  | OR(95% CI)              | <i>P</i>  | OR(95% CI)              | <i>P</i> | OR(95% CI)                       | <i>P</i> |
| <b>Healthy vs. Sarcopenia</b>            |                         |           |                         |           |                         |          |                                  |          |
| BMR                                      | 0.042<br>(0.007,0.249)  | 0.001**   |                         |           |                         |          |                                  |          |
| BMR/BMI                                  |                         |           | 2.621<br>(0.619,11.088) | 0.190     |                         |          |                                  |          |
| BMR/BSA                                  |                         |           |                         |           | 0.078<br>(0.014,0.428)  | 0.003**  |                                  |          |
| BMR/Height <sup>2</sup>                  |                         |           |                         |           |                         |          | 0.212<br>(0.061,0.737)           | 0.015*   |
| ECW/ICW                                  | 7.251<br>(1.704,30.854) | 0.007**   | 5.573<br>(1.443,21.526) | 0.013*    | 4.346<br>(1.077,17.530) | 0.039*   | 4.148<br>(1.030,16.713)          | 0.045*   |
| <b>Healthy vs. Sarcopenic obesity</b>    |                         |           |                         |           |                         |          |                                  |          |
| BMR                                      | 0.006<br>(0.000,0.087)  | <0.001*** |                         |           |                         |          |                                  |          |
| BMR/BMI                                  |                         |           | 0.002<br>(0.000,0.053)  | <0.001*** |                         |          |                                  |          |
| BMR/BSA                                  |                         |           |                         |           | —                       | 0.998    |                                  |          |
| BMR/Height <sup>2</sup>                  |                         |           |                         |           |                         |          | 0.766<br>(0.167,3.524)           | 0.732    |
| ECW/ICW                                  | 1.703<br>(0.376,7.719)  | 0.490     | 2.459<br>(0.461,13.118) | 0.292     | 1.739<br>(0.301,10.064) | 0.537    | 1.593<br>(0.437,5.807)           | 0.481    |
| <b>Sarcopenia vs. Sarcopenic obesity</b> |                         |           |                         |           |                         |          |                                  |          |
| BMR                                      | 0.217<br>(0.018,2.601)  | 0.228     |                         |           |                         |          |                                  |          |
| BMR/BMI                                  |                         |           | —                       | 0.999     |                         |          |                                  |          |
| BMR/BSA                                  |                         |           |                         |           | —                       | 0.999    |                                  |          |
| BMR/Height <sup>2</sup>                  |                         |           |                         |           |                         |          | 20.563<br>(1.304,324.336)        | 0.032*   |
| ECW/ICW                                  | 0.088<br>(0.011,0.678)  | 0.020*    | 0.109<br>(0.008,1.501)  | 0.098     | 0.055<br>(0.001,0.750)  | 0.030*   | 0.097<br>(0.010,0.935)           | 0.044*   |

MODEL3: Model 2 + ECW/ICW

BMI, Body mass index; BMR, Basal metabolic rate; BSA, Body surface area; ICW, Intracellular water; ECW, Extracellular water.

\*  $P < 0.05$ , \*\*  $P < 0.001$ , \*\*\*  $P < 0.001$



**Supplementary Table S6. Predictive role of BMR and ECW/TBW**

|                                          | MODEL 4 <sub>BMR</sub>   |           | MODEL 4 <sub>BMR/BMI</sub> |           | MODEL 4 <sub>BMR/BSA</sub> |          | MODEL 4 <sub>BMR/ Height<sup>2</sup></sub> |          |
|------------------------------------------|--------------------------|-----------|----------------------------|-----------|----------------------------|----------|--------------------------------------------|----------|
|                                          | OR(95% CI)               | <i>P</i>  | OR(95% CI)                 | <i>P</i>  | OR(95% CI)                 | <i>P</i> | OR(95% CI)                                 | <i>P</i> |
| <b>Healthy vs. Sarcopenia</b>            |                          |           |                            |           |                            |          |                                            |          |
| BMR                                      | 0.046<br>(0.007,0.280)   | 0.001**   |                            |           |                            |          |                                            |          |
| BMR/BMI                                  |                          |           | 2.953<br>(0.655,13.317)    | 0.159     |                            |          |                                            |          |
| BMR/BSA                                  |                          |           |                            |           | 0.084<br>(0.015,0.478)     | 0.005**  |                                            |          |
| BMR/Height <sup>2</sup>                  |                          |           |                            |           |                            |          | 0.259<br>(0.074,0.914)                     | 0.036*   |
| ECW/TBW                                  | 10.062<br>(2.414,41.942) | 0.002**   | 9.119<br>(2.359,35.244)    | 0.001**   | 6.991<br>(1.740,28.091)    | 0.006**  | 6.582<br>(1.609,26.914)                    | 0.009**  |
| <b>Healthy vs. Sarcopenic obesity</b>    |                          |           |                            |           |                            |          |                                            |          |
| BMR                                      | 0.005<br>(0.000,0.079)   | <0.001*** |                            |           |                            |          |                                            |          |
| BMR/BMI                                  |                          |           | 0.001<br>(0.000,0.042)     | <0.001*** |                            |          |                                            |          |
| BMR/BSA                                  |                          |           |                            |           | —                          | 0.998    |                                            |          |
| BMR/Height <sup>2</sup>                  |                          |           |                            |           |                            |          | 0.807<br>(0.173,3.760)                     | 0.784    |
| ECW/TBW                                  | 2.923<br>(0.512,16.683)  | 0.227     | 6.336<br>(0.636,63.152)    | 0.116     | 4.748<br>(0.473,47.633)    | 0.185    | 1.968<br>(0.503,7.696)                     | 0.331    |
| <b>Sarcopenia vs. Sarcopenic obesity</b> |                          |           |                            |           |                            |          |                                            |          |
| BMR                                      | 0.221<br>(0.020,2.492)   | 0.222     |                            |           |                            |          |                                            |          |
| BMR/BMI                                  |                          |           | —                          | 0.998     |                            |          |                                            |          |
| BMR/BSA                                  |                          |           |                            |           | —                          | 0.998    |                                            |          |
| BMR/Height <sup>2</sup>                  |                          |           |                            |           |                            |          | 15.522<br>(1.171,205.743)                  | 0.038*   |
| ECW/TBW                                  | 0.125<br>(0.016,0.948)   | 0.044*    | 0.171<br>(0.012,2.358)     | 0.187     | 0.076<br>(0.006,1.001)     | 0.050    | 0.206<br>(0.024,1.786)                     | 0.152    |

MODEL 4: Model 2 + ECW/TBW

BMI, Body mass index; BMR, Basal metabolic rate; BSA, Body surface area; TBW, Total body water; ECW, Extracellular water.

\**P*<0.05, \*\* *P*<0.01, \*\*\* *P*<0.001

**Supplementary Table S7. Correlations among SMI, BMR, carbohydrates intake and body water distribution**

|               | SMI       | BMR       | Carbohydrates | ECW/ICW  | ECW/TBW |
|---------------|-----------|-----------|---------------|----------|---------|
| SMI           | 1         |           |               |          |         |
| BMR           | 0.941***  | 1         |               |          |         |
| Carbohydrates | 0.222***  | 0.250***  | 1             |          |         |
| ECW/ICW       | -0.273*** | -0.244*** | -0.073        | 1        |         |
| ECW/TBW       | -0.273*** | -0.244*** | -0.074        | 1.000*** | 1       |

BMR, Basal metabolic rate; TBW, Total body water; ICW, Intracellular water; ECW, Extracellular water; SMI, Appendicular skeletal muscle index.

\*\*\*  $P < 0.001$

**Supplementary Table S8. Moderated mediation analysis for carbohydrates, BMR, SMI and body water distribution**

|                   | Effect | Boot SE | Boot LLCI | Boot ULCI |
|-------------------|--------|---------|-----------|-----------|
| ECW/ICW           |        |         |           |           |
| Low (0.6154)      | 0.0036 | 0.0010  | 0.0016    | 0.0055    |
| Moderate (0.6310) | 0.0039 | 0.0011  | 0.0018    | 0.0060    |
| High (0.6490)     | 0.0042 | 0.0012  | 0.0019    | 0.0065    |
| ECW/TBW           |        |         |           |           |
| Low (0.3810)      | 0.0036 | 0.0010  | 0.0017    | 0.0056    |
| Moderate (0.3869) | 0.0039 | 0.0011  | 0.0018    | 0.0060    |
| High (0.3936)     | 0.0042 | 0.0012  | 0.0019    | 0.0065    |

SE, Standard Error; LLCI, Lower limit confidence interval; ULCI, Upper limit confidence interval; BMR, Basal metabolic rate; TBW, Total body water; ICW, Intracellular water; ECW, Extracellular water; SMI, Appendicular skeletal muscle index
